# Supplementary material for: Research on the controllable degradation of N-methylamido and dialkylamino substituted at the 5th position of the benzene ring in chlorsulfuron in acidic soil
Source: Royal Society of Chemistry journal article supplement (doi:10.1039/d0ra00811g), 2020-01-01

## Supporting information

### Research on Controllable Degradation of *N*-methylamido and dialkylamino Substituted at the 5<sup>th</sup> position of the Benzene Ring in Chlorsulfuron in Acidic Soil

Fan-Fei Meng<sup>a</sup>, Lei Wu<sup>a</sup>, Yu-Cheng Gu<sup>b</sup>, Sha Zhou<sup>a</sup>, Yong-Hong Li<sup>a</sup>, Ming-Gui Chen<sup>c</sup>, Shaa Zhou<sup>d</sup>, Yang-Yang Zhao<sup>a</sup>, Huan-Gong Li<sup>a</sup>, Yi Ma<sup>a,\*</sup>, Zheng-Ming Li<sup>a,\*</sup>

<sup>a</sup> State Key Laboratory of Elemento-Organic Chemistry, Collaborative Innovation Centre of Chemical Science and Engineering (Tianjin), College of Chemistry, Nankai University, Tianjin 300071, China

<sup>b</sup> Syngenta Jealott's Hill International Research Centre, RG42 6EY, United Kingdom, UK

<sup>c</sup> Tianjin Tianbin Ruicheng Environmental Technology Engineering Co., Ltd, Tianjin 300000, China

<sup>d</sup> College of Agriculture and Food Science, Zhejiang A&F University, Zhejiang 311300, China

\*Corresponding Author: Zheng-Ming Li

Email: nkzml@vip.163.com,

Tel.: 0086-22-23503732,

Fax: 0086-22-23505948.

|                                                                          |            |
|--------------------------------------------------------------------------|------------|
| <b>Crystal data of M03...</b>                                            | <b>SI1</b> |
| <b>Crystal data of N03.....</b>                                          | <b>SI2</b> |
| <b>The standard curves of target compounds.....</b>                      | <b>SI3</b> |
| <b>Characteristic data of target compounds and intermediates 18.....</b> | <b>SI4</b> |
| <b>Degradation curves of target compounds in pH 5.52 soil.....</b>       | <b>SI5</b> |

## SI.1. Crystal data of M03

---

|                                                |                                                                                                                                                                                                                    |
|------------------------------------------------|--------------------------------------------------------------------------------------------------------------------------------------------------------------------------------------------------------------------|
| Molecular formula                              | C <sub>17</sub> H <sub>16</sub> ClN <sub>6</sub> O <sub>5</sub> S                                                                                                                                                  |
| Formula weight                                 | 451.87                                                                                                                                                                                                             |
| Temperature                                    | 113.15 K                                                                                                                                                                                                           |
| Crystal system, Space group                    | triclinic system, P-1                                                                                                                                                                                              |
| Radiation                                      | MoK $\alpha$ ( $\lambda = 0.71073$ Å)                                                                                                                                                                              |
| Unit cell dimensions                           | $a = 7.8939(16)$ Å, $b = 8.9985(18)$ Å, $c = 14.466(3)$ Å; $\alpha = 85.32(3)^\circ$ ,<br>$\beta = 81.63(3)^\circ$ , $\gamma = 72.73(3)^\circ$ ; cell ratio as $a/b = 0.8774$ , $b/c = 0.6220$ ,<br>$c/a = 1.8325$ |
| calculated density                             | 1.547 g/cm <sup>3</sup>                                                                                                                                                                                            |
| Volume                                         | 970.0(4) Å <sup>3</sup>                                                                                                                                                                                            |
| Z                                              | 2                                                                                                                                                                                                                  |
| Absorption coefficient                         | 0.350 mm <sup>-1</sup>                                                                                                                                                                                             |
| F(000)                                         | 466.0                                                                                                                                                                                                              |
| Crystal size                                   | 0.20 mm x 0.18 mm x 0.12 mm                                                                                                                                                                                        |
| 2 $\theta$ range for data collection/ $^\circ$ | 4.744 $^\circ$ to 50.052 $^\circ$                                                                                                                                                                                  |
| Index ranges                                   | -9 $\leq h \leq$ 9; -10 $\leq k \leq$ 10; -17 $\leq l \leq$ 17                                                                                                                                                     |
| Reflections collected                          | 9370                                                                                                                                                                                                               |
| Independent reflections                        | 3424 [ $R_{\text{int}} = 0.0315$ , $R_{\text{sigma}} = 0.0346$ ]                                                                                                                                                   |
| Data/restraints/parameters                     | 3424/3/274                                                                                                                                                                                                         |
| Goodness-of-fit on F <sup>2</sup>              | 1.058                                                                                                                                                                                                              |
| Final R indexes [ $I \geq 2\sigma(I)$ ]        | $R_1 = 0.0570$ , $wR_2 = 0.1506$                                                                                                                                                                                   |
| Final R indexes [all data]                     | $R_1 = 0.0676$ , $wR_2 = 0.1597$                                                                                                                                                                                   |
| Largest difference peak and hole               | 1.67/-0.59 e/Å <sup>-3</sup>                                                                                                                                                                                       |

---

## SI 2. Crystal data of N03

---

|                                    |                                                                                                                                                                                                               |
|------------------------------------|---------------------------------------------------------------------------------------------------------------------------------------------------------------------------------------------------------------|
| Molecular formula                  | C <sub>16</sub> H <sub>19</sub> ClN <sub>6</sub> O <sub>4</sub> S                                                                                                                                             |
| Formula weight                     | 426.88                                                                                                                                                                                                        |
| Temperature                        | 113(2) K                                                                                                                                                                                                      |
| Crystal system, Space group        | Monoclinic system, P2(1)/c                                                                                                                                                                                    |
| Radiation                          | MoK $\alpha$ ( $\lambda = 0.71073$ Å)                                                                                                                                                                         |
| Unit cell dimensions               | $a = 10.2847(5)$ Å, $b = 17.1412(7)$ Å, $c = 11.2410(5)$ Å; $\alpha = 90^\circ$ , $\beta =$<br>$102.533(5)^\circ$ , $\gamma = 90^\circ$ ; cell ratio as $a/b = 0.6000$ , $b/c = 1.5249$ , $c/a =$<br>$1.0930$ |
| calculated density                 | 1.466 g/cm <sup>3</sup>                                                                                                                                                                                       |
| Volume                             | 1934.48(15) Å <sup>3</sup>                                                                                                                                                                                    |
| Z                                  | 4                                                                                                                                                                                                             |
| Absorption coefficient             | 0.342 mm <sup>-1</sup>                                                                                                                                                                                        |
| F(000)                             | 888                                                                                                                                                                                                           |
| Crystal size                       | 0.200 mm x 0.180 mm x 0.120 mm                                                                                                                                                                                |
| $\theta$ range for data collection | 2.028 $^\circ$ to 26.372 $^\circ$                                                                                                                                                                             |
| Limiting indices                   | -12 $\leq h \leq$ 12; -21 $\leq k \leq$ 21; -14 $\leq l \leq$ 14                                                                                                                                              |
| Reflections collected/unique       | 20402 / 3952 [ $R_{\text{int}} = 0.0422$ ]                                                                                                                                                                    |
| Completeness to $\theta = 25.242$  | 100.0 %                                                                                                                                                                                                       |
| Absorption correction              | Semi-empirical from equivalents                                                                                                                                                                               |
| Max. and min. transmission         | 1 and 0.51980                                                                                                                                                                                                 |
| Refinement method                  | Full-matrix least-squares on F <sup>2</sup>                                                                                                                                                                   |
| Data/restraints/parameters         | 3952/2/262                                                                                                                                                                                                    |
| Goodness-of-fit on F <sup>2</sup>  | 1.040                                                                                                                                                                                                         |

---

|                                      |                                   |
|--------------------------------------|-----------------------------------|
| Final R indices [ $I > 2\sigma(I)$ ] | $R_1 = 0.0496$ , $wR_2 = 0.1274$  |
| R indices (all data)                 | $R_1 = 0.0589$ , $wR_2 = 0.1345$  |
| Extinction coefficient               | n/a                               |
| Largest diff. peak and hole          | 0.621 and -0.548 e/Å <sup>3</sup> |

### SI3. The standard curves of target compounds

| Compud.             | Standard curve     | Correlation coefficient ( $R^2$ ) |
|---------------------|--------------------|-----------------------------------|
| <b>M01</b>          | Y=64660.8X-17.8837 | $R^2 > 0.9999$                    |
| <b>M02</b>          | Y=63086.9X-7391.33 | $R^2 > 0.9999$                    |
| <b>M03</b>          | Y=52581.4X+546.885 | $R^2 > 0.9999$                    |
| <b>M04</b>          | Y=49791.6X-349.667 | $R^2 > 0.9999$                    |
| <b>M05</b>          | Y=55169X+530.779   | $R^2 > 0.9999$                    |
| <b>N01</b>          | Y=59911.9X+10548.8 | $R^2 > 0.9999$                    |
| <b>N02</b>          | Y=55456.3X+8474.75 | $R^2 > 0.9999$                    |
| <b>N03</b>          | Y=66717X+626.688   | $R^2 > 0.9999$                    |
| <b>N04</b>          | Y=71978.9X+302.746 | $R^2 > 0.9999$                    |
| <b>N05</b>          | Y=50577.7X-2712.01 | $R^2 > 0.9999$                    |
| <b>N06</b>          | Y=47970.7X-1104.17 | $R^2 > 0.9999$                    |
| <b>N07</b>          | Y=50130.9X+1689.56 | $R^2 > 0.9999$                    |
| <b>N08</b>          | Y=49832.2X-395.95  | $R^2 > 0.9999$                    |
| <b>N09</b>          | Y=45583.9X+2775.24 | $R^2 > 0.9999$                    |
| <b>N10</b>          | Y=43188X+3159.8    | $R^2 > 0.9999$                    |
| <b>N11</b>          | Y=47694.5X+4134.51 | $R^2 > 0.9999$                    |
| <b>N12</b>          | Y=49563.8X+3671.63 | $R^2 > 0.9999$                    |
| <b>N13</b>          | Y=33761.4X+511.688 | $R^2 > 0.9999$                    |
| <b>Chlosulfuron</b> | Y=41190.4X+7389.03 | $R^2 > 0.9999$                    |

### SI4. Characteristic data of target compounds and intermediates 18

Sodium (4-methoxy-6-methyl-1,3,5-triazin-2-yl)(phenoxy-carbonyl)amide **18**: White solid, yield 92.5%; <sup>1</sup>H NMR (400 MHz, MeOD-*dd*)  $\delta$  7.07 (t,  $J = 7.6$  Hz, 2H, Ph-**H**), 6.70 (d,  $J = 7.8$  Hz, 2H, Ph-**H**), 6.59 (t,  $J = 7.1$  Hz, 1H, Ph-**H**), 3.98 (s, 3H, OCH<sub>3</sub>), 2.40 (s, 3H, CH<sub>3</sub>). <sup>13</sup>C NMR (101 MHz, DMSO-*dd*)  $\delta$ : 175.89, 171.81, 171.08, 159.57, 153.97, 129.15, 122.52, 116.00, 53.48, 25.57. HRMS calcd for C<sub>12</sub>H<sub>11</sub>N<sub>4</sub>NaO<sub>3</sub><sup>+</sup>[M+H] 283.0807, found 283.0801.

*N*-(4-chloro-3-(*N*-((4-methoxy-6-methyl-1,3,5-triazin-2-yl)carbamoyl)sulfamoyl)phenyl)-*N*-methylformamide **M01**: White solid, yield 89.3%, m.p. 181~183 °C; <sup>1</sup>H NMR (400 MHz, Acetone-*dd*)  $\delta$ : 12.85 (s, 1H, SO<sub>2</sub>NHCONH), 9.76 (s, 1H, NCOH), 7.43 (s, 1H, SO<sub>2</sub>NHCONH), 7.32 (d,  $J = 8.8$  Hz, 1H, Ph-**H**), 6.85 (d,  $J = 6.5$  Hz, 1H, Ph-**H**), 5.76 (s, 1H, Ph-**H**), 4.03 (s, 3H, OCH<sub>3</sub>), 2.85 (s, 3H, NCH<sub>3</sub>), 2.51 (s, 3H, CH<sub>3</sub>). <sup>13</sup>C NMR (101 MHz, MeOD-*dd*)  $\delta$ : 178.70, 172.16, 149.04, 147.48, 136.61, 133.61, 131.77, 116.91, 115.92, 114.65, 114.58, 54.74, 28.78, 23.81. HRMS calcd for C<sub>14</sub>H<sub>15</sub>ClN<sub>6</sub>O<sub>5</sub>S<sup>+</sup>[M+H] 415.0591,

found 415.0583.

*N*-(4-chloro-3-(*N*-((4-methoxy-6-methyl-1,3,5-triazin-2-yl)carbamoyl)sulfamoyl)phenyl)-*N*-methylacetamide **M02**: White solid, yield 83.5%, m.p 146-148 °C. <sup>1</sup>H NMR (400 MHz, CDCl<sub>3</sub>) δ: 12.82 (s, 1H, SO<sub>2</sub>NHCONH), 8.15 (s, 1H, Ph-H), 8.04 (s, 1H, SO<sub>2</sub>NHCONH), 7.57 (d, *J* = 7.2 Hz, 1H, Ph-H), 7.43 (s, 1H, Ph-H), 4.06 (s, 3H, OCH<sub>3</sub>), 3.30 (s, 3H, NCH<sub>3</sub>), 2.59 (s, 3H, CH<sub>3</sub>), 1.94 (s, 3H, COCH<sub>3</sub>). <sup>13</sup>C NMR (101 MHz, CDCl<sub>3</sub>) δ: 179.20, 170.59, 170.20, 163.43, 148.02, 143.41, 137.11, 133.15, 132.89, 131.82, 130.72, 55.71, 37.20, 25.44, 22.57. HRMS calcd for C<sub>15</sub>H<sub>17</sub>ClN<sub>6</sub>O<sub>5</sub>S<sup>+</sup>[M+H] 429.0748, found 429.0741.

*N*-(4-chloro-3-(*N*-((4-methoxy-6-methyl-1,3,5-triazin-2-yl)carbamoyl)sulfamoyl)phenyl)-*N*-methylcyclopropanecarboxamide **M03**: White solid, yield 88.1%, m.p. 155~157 °C; <sup>1</sup>H NMR (400 MHz, CDCl<sub>3</sub>) δ: 12.82 (s, 1H, SO<sub>2</sub>NHCONH), 8.26 (d, *J* = 2.4 Hz, 1H, Ph-H), 7.71 (s, 1H, SO<sub>2</sub>NHCONH), 7.56 (d, *J* = 8.4 Hz, 1H, Ph-H), 7.51 (dd, *J* = 8.5, 2.4 Hz, 1H, Ph-H), 4.06 (s, 3H, OCH<sub>3</sub>), 3.35 (s, 3H, NCH<sub>3</sub>), 2.59 (s, 3H, CH<sub>3</sub>), 1.41 (s, 1H, Cyclopropyl-H), 1.15–0.99 (m, 2H, Cyclopropyl-H<sub>2</sub>), 0.84–0.72 (m, 2H, Cyclopropyl-H<sub>2</sub>). <sup>13</sup>C NMR (101 MHz, CDCl<sub>3</sub>) δ: 179.25, 173.44, 170.76, 163.41, 147.93, 143.32, 136.92, 133.15, 132.66, 131.55, 129.96, 55.77, 37.38, 25.49, 13.04, 9.08. HRMS calcd for C<sub>17</sub>H<sub>19</sub>ClN<sub>6</sub>O<sub>5</sub>S<sup>+</sup>[M+H] 455.0904, found 455.0900.

*N*-(4-chloro-3-(*N*-((4-methoxy-6-methyl-1,3,5-triazin-2-yl)carbamoyl)sulfamoyl)phenyl)-*N*-methylpivalamide **M04**: White solid, yield 87.2%, m.p. 154~156 °C; <sup>1</sup>H NMR (400 MHz, CDCl<sub>3</sub>) δ: 12.81 (s, 1H, SO<sub>2</sub>NHCONH), 8.19 (s, 1H, Ph-H), 7.81 (s, 1H, SO<sub>2</sub>NHCONH), 7.56 (d, *J* = 8.3 Hz, 1H, Ph-H), 7.46 (d, *J* = 8.4 Hz, 1H, Ph-H), 4.07 (s, 3H, OCH<sub>3</sub>), 3.27 (s, 3H, NCH<sub>3</sub>), 2.60 (s, 3H, CH<sub>3</sub>), 1.12 (s, 9H, C(CH<sub>3</sub>)<sub>3</sub>). <sup>13</sup>C NMR (101 MHz, CDCl<sub>3</sub>) δ: 179.30, 178.08, 170.64, 163.44, 147.87, 144.61, 136.91, 134.91, 132.86, 132.47, 130.72, 55.75, 41.12, 40.80, 29.37, 25.48. HRMS calcd for C<sub>18</sub>H<sub>23</sub>ClN<sub>6</sub>O<sub>5</sub>S<sup>+</sup>[M+H] 471.1217, found 471.1216.

*N*-(4-chloro-3-(*N*-((4-methoxy-6-methyl-1,3,5-triazin-2-yl)carbamoyl)sulfamoyl)phenyl)-*N*-methylbenzamide **M05**: White solid, yield 90.3%, m.p. 95~97 °C; <sup>1</sup>H NMR (400 MHz, CDCl<sub>3</sub>) δ: 12.79 (s, 1H, SO<sub>2</sub>NHCONH), 8.18 (d, *J* = 2.6 Hz, 1H, Ph-H), 7.47 (s, 1H, SO<sub>2</sub>NHCONH), 7.32 (m, 2H, Ph-H), 7.30 – 7.21 (m, 4H, Ph-H), 7.11 – 7.05 (dd, *J* = 12.0, 2.0 Hz, 1H, Ph-H), 4.06 (s, 3H, OCH<sub>3</sub>), 3.53 (s, 3H, NCH<sub>3</sub>), 2.58 (s, 3H, CH<sub>3</sub>). <sup>13</sup>C NMR (101 MHz, CDCl<sub>3</sub>) δ: 170.62, 163.38, 147.85, 143.99, 136.70, 134.82, 133.28, 132.07, 130.29, 129.11, 128.78, 128.53, 128.32, 128.29, 126.95, 55.77, 38.34, 25.48. HRMS calcd for C<sub>20</sub>H<sub>19</sub>ClN<sub>6</sub>O<sub>5</sub>S<sup>+</sup>[M+H] 491.0904, found 491.0899.

2-chloro-*N*-((4-methoxy-6-methyl-1,3,5-triazin-2-yl)carbamoyl)-5-(methyl(propyl)amino)benzenesulfonamide **N02**: White solid, yield 87.9%, m.p. 162~164 °C; <sup>1</sup>H NMR

(400 MHz, CDCl<sub>3</sub>) δ 12.71 (s, 1H, SO<sub>2</sub>NHCONH), 7.51 (d, *J* = 3.1 Hz, 1H, Ph-**H**), 7.30 (s, 1H, SO<sub>2</sub>NHCONH), 7.25 (d, *J* = 10.1 Hz, 1H, Ph-**H**), 6.74 (dd, *J* = 9.0, 3.2 Hz, 1H, Ph-**H**), 4.05 (s, 3H, OCH<sub>3</sub>), 3.32 (t, *J* = 7.6 Hz, 2H, NCH<sub>2</sub>CH<sub>2</sub>CH<sub>3</sub>), 2.99 (s, 3H, NCH<sub>3</sub>), 2.57 (s, 3H, CH<sub>3</sub>), 1.66-1.59 (m, 2H, NCH<sub>2</sub>CH<sub>2</sub>CH<sub>3</sub>), 0.93 (t, *J* = 7.4 Hz, 3H, NCH<sub>2</sub>CH<sub>2</sub>CH<sub>3</sub>). <sup>13</sup>C NMR (101 MHz, CDCl<sub>3</sub>) δ 178.08, 170.70, 163.39, 147.93, 147.89, 135.81, 132.03, 116.96, 116.06, 115.14, 55.71, 54.30, 38.56, 25.46, 19.89, 11.44. HRMS calcd for C<sub>16</sub>H<sub>21</sub>ClN<sub>6</sub>O<sub>4</sub>S<sup>+</sup>[M+H] 429.1112, found 429.1108.

5-(allyl(methyl)amino)-2-chloro-N-((4-methoxy-6-methyl-1,3,5-triazin-2-yl)carbamoyl)benzenesulfonamide **N03**: White solid, yield 88.6%, m.p. 172~174 °C; <sup>1</sup>H NMR (400 MHz, CDCl<sub>3</sub>) δ 12.67 (s, 1H, SO<sub>2</sub>NHCONH), 7.55 (d, *J* = 3.0 Hz, 1H, Ph-**H**), 7.34 (s, 1H, SO<sub>2</sub>NHCONH), 7.25 (d, *J* = 7.9 Hz, 1H, Ph-**H**), 6.76 (dd, *J* = 8.9, 3.1 Hz, 1H, Ph-**H**), 5.80 (ddd, *J* = 15.2, 9.9, 4.8 Hz, 1H, CH=CH<sub>2</sub>), 5.17 (dd, *J* = 20.5, 13.7 Hz, 2H, CH=CH<sub>2</sub>), 4.05 (s, 3H, OCH<sub>3</sub>), 3.97 (d, *J* = 4.7 Hz, 2H, NCH<sub>2</sub>), 3.02 (s, 3H, NCH<sub>3</sub>), 2.57 (s, 3H, CH<sub>3</sub>). <sup>13</sup>C NMR (101 MHz, CDCl<sub>3</sub>) δ 179.55, 170.50, 163.40, 148.00, 147.89, 135.85, 132.08, 132.02, 117.47, 116.92, 116.83, 115.51, 55.71, 54.98, 38.33, 25.46. HRMS calcd for C<sub>16</sub>H<sub>19</sub>ClN<sub>6</sub>O<sub>4</sub>S<sup>+</sup>[M+H] 427.0955, found 427.0951.

2-chloro-N-((4-methoxy-6-methyl-1,3,5-triazin-2-yl)carbamoyl)-5-(methyl(prop-2-yn-1-yl)amino)benzenesulfonamide **N04**: Yellow solid, yield 91.3%, m.p. 173~175 °C; <sup>1</sup>H NMR (400 MHz, CDCl<sub>3</sub>) δ 12.69 (s, 1H, SO<sub>2</sub>NHCONH), 7.66 (d, *J* = 3.1 Hz, 1H, Ph-**H**), 7.46 (s, 1H, SO<sub>2</sub>NHCONH), 7.32 (d, *J* = 8.9 Hz, 1H, Ph-**H**), 6.92 (dd, *J* = 8.9, 3.1 Hz, 1H, Ph-**H**), 4.08 (d, *J* = 2.3 Hz, 2H, CH<sub>2</sub>CCH), 4.05 (s, 3H, OCH<sub>3</sub>), 3.05 (s, 3H, NCH<sub>3</sub>), 2.57 (s, 3H, CH<sub>3</sub>), 2.23 (t, *J* = 2.3 Hz, 1H, C≡CH). <sup>13</sup>C NMR (101 MHz, CDCl<sub>3</sub>) δ 179.12, 170.66, 163.40, 147.90, 147.61, 136.02, 132.09, 119.00, 118.88, 117.23, 77.97, 72.85, 55.72, 42.22, 38.70, 25.46. HRMS calcd for C<sub>16</sub>H<sub>17</sub>ClN<sub>6</sub>O<sub>4</sub>S<sup>+</sup>[M+H] 425.0799, found 425.0794.

5-(butyl(methyl)amino)-2-chloro-N-((4-methoxy-6-methyl-1,3,5-triazin-2-yl)carbamoyl)benzenesulfonamide **N06**: White solid, yield 86.3%, m.p. 109~111 °C; <sup>1</sup>H NMR (400 MHz, CDCl<sub>3</sub>) δ 12.66 (s, 1H, SO<sub>2</sub>NHCONH), 7.56 (s, 1H, Ph-**H**), 7.44 (s, 1H, SO<sub>2</sub>NHCONH), 7.28 (d, *J* = 7.3 Hz, 1H, Ph-**H**), 6.81 (d, *J* = 7.9 Hz, 1H, Ph-**H**), 4.07 (s, 3H, OCH<sub>3</sub>), 3.37 (t, *J* = 7.2 Hz, 2H, NCH<sub>2</sub>CH<sub>2</sub>CH<sub>2</sub>CH<sub>3</sub>), 3.01 (s, 3H, NCH<sub>3</sub>), 2.59 (s, 3H, CH<sub>3</sub>), 1.66-1.52 (m, 2H, NCH<sub>2</sub>CH<sub>2</sub>CH<sub>2</sub>CH<sub>3</sub>), 1.43-1.30 (m, 2H, NCH<sub>2</sub>CH<sub>2</sub>CH<sub>2</sub>CH<sub>3</sub>), 0.97 (t, *J* = 7.3 Hz, 3H, NCH<sub>2</sub>CH<sub>2</sub>CH<sub>2</sub>CH<sub>3</sub>). <sup>13</sup>C NMR (101 MHz, CDCl<sub>3</sub>) δ 178.78, 170.80, 163.39, 147.87, 147.64, 135.88, 132.06, 117.38, 116.59, 115.55, 55.69, 52.57, 38.70, 28.63, 25.43, 20.21, 13.90. HRMS calcd for C<sub>17</sub>H<sub>23</sub>ClN<sub>6</sub>O<sub>4</sub>S<sup>+</sup>[M+H] 443.1268, found 443.1266.

2-chloro-5-(isobutyl(methyl)amino)-N-((4-methoxy-6-methyl-1,3,5-triazin-2-yl)carbamoyl)benzenesulfonamide **N07**: White solid, yield 86.9%, m.p. 128~130 °C; <sup>1</sup>H NMR (400 MHz, CDCl<sub>3</sub>) δ 12.64 (s, 1H, SO<sub>2</sub>NHCONH), 7.51 (d, *J* = 3.2 Hz, 1H, Ph-**H**), 7.31 (s, 1H, SO<sub>2</sub>NHCONH), 7.25 (d, *J* = 9.0 Hz, 1H, Ph-**H**), 6.73 (dd, *J* = 9.0, 3.2 Hz, 1H, Ph-**H**), 4.05 (s, 3H, OCH<sub>3</sub>), 3.16 (d, *J* = 7.4 Hz,

2H, CH<sub>2</sub>), 3.02 (s, 3H, NCH<sub>3</sub>), 2.57 (s, 3H, CH<sub>3</sub>), 2.05 (dt, *J* = 13.8, 6.8 Hz, 1H, CH), 0.93 (d, *J* = 6.6 Hz, 6H, CH(CH<sub>3</sub>)<sub>2</sub>). <sup>13</sup>C NMR (101 MHz, CDCl<sub>3</sub>) δ 179.54, 170.85, 163.39, 148.14, 147.88, 135.77, 131.96, 116.86, 115.99, 115.05, 60.54, 55.71, 39.60, 27.22, 25.46, 20.32. HRMS calcd for C<sub>17</sub>H<sub>23</sub>ClN<sub>6</sub>O<sub>4</sub>S<sup>+</sup>[M+H] 443.1268, found 443.1264.

2-chloro-5-(ethyl(propyl)amino)-N-((4-methoxy-6-methyl-1,3,5-triazin-2-yl)carbamoyl)benzenesulfonamide **N08**: White solid, yield 86.2%, m.p. 181~183 °C; <sup>1</sup>H NMR (400 MHz, CDCl<sub>3</sub>) δ 12.66 (s, 1H, SO<sub>2</sub>NHCONH), 7.56 (s, 1H, Ph-H), 7.37 (s, 1H, SO<sub>2</sub>NHCONH), 7.28 (d, *J* = 3.1 Hz, 1H, Ph-H), 6.85 (d, *J* = 7.8 Hz, 1H, Ph-H), 4.07 (s, 3H, OCH<sub>3</sub>), 3.43 (t, *J* = 4.0 Hz, 2H, NCH<sub>2</sub>CH<sub>3</sub>), 3.29 (t, *J* = 4.4 Hz, 2H, NCH<sub>2</sub>CH<sub>2</sub>CH<sub>3</sub>), 2.59 (s, 3H, CH<sub>3</sub>), 1.30-1.25 (m, 2H, NCH<sub>2</sub>CH<sub>2</sub>CH<sub>3</sub>), 1.20 (t, *J* = 5.6 Hz, 3H, NCH<sub>2</sub>CH<sub>3</sub>), 0.97 (t, *J* = 6.8 Hz, 3H, NCH<sub>2</sub>CH<sub>2</sub>CH<sub>3</sub>). <sup>13</sup>C NMR (101 MHz, CDCl<sub>3</sub>) δ 179.32, 171.00, 163.40, 147.87, 146.13, 136.04, 132.20, 117.72, 116.16, 115.86, 55.69, 52.69, 45.83, 25.43, 20.30, 11.84, 11.37. HRMS calcd for C<sub>17</sub>H<sub>23</sub>ClN<sub>6</sub>O<sub>4</sub>S<sup>+</sup>[M+H] 443.1268, found 443.1264.

2-chloro-5-(cyclopentyl(methyl)amino)-N-((4-methoxy-6-methyl-1,3,5-triazin-2-yl)carbamoyl)benzenesulfonamide **N09**: White solid, yield 91.1%, m.p. 81~83 °C; <sup>1</sup>H NMR (400 MHz, CDCl<sub>3</sub>) δ 12.70 (s, 1H, SO<sub>2</sub>NHCONH), 7.65 (d, *J* = 2.9 Hz, 1H, Ph-H), 7.41 (s, 1H, SO<sub>2</sub>NHCONH), 7.26 (s, 1H, Ph-H), 6.88 (dd, *J* = 9.0, 3.1 Hz, 1H, Ph-H), 4.27 – 4.18 (m, 1H, Cyclopentyl-CH), 4.08 (s, 3H, OCH<sub>3</sub>), 2.86 (s, 3H, NCH<sub>3</sub>), 2.60 (s, 3H, CH<sub>3</sub>), 2.02-1.89 (m, 2H, Cyclopentyl-CH<sub>2</sub>), 1.70-1.83 (m, 2H, Cyclopentyl-CH<sub>2</sub>), 1.54-1.70 (m, 4H, Cyclopentyl-CH<sub>2</sub>CH<sub>2</sub>). <sup>13</sup>C NMR (101 MHz, CDCl<sub>3</sub>) δ 179.18, 170.86, 149.24, 147.94, 135.78, 131.96, 129.63, 118.22, 116.71, 116.40, 59.99, 32.14, 28.77, 25.45, 24.25. HRMS calcd for C<sub>18</sub>H<sub>23</sub>ClN<sub>6</sub>O<sub>4</sub>S<sup>+</sup>[M+H] 455.1268, found 455.1265.

2-chloro-5-(dipropylamino)-N-((4-methoxy-6-methyl-1,3,5-triazin-2-yl)carbamoyl)benzenesulfonamide **N10**: White solid, yield 87.6%, m.p. 158~160 °C; <sup>1</sup>H NMR (400 MHz, CDCl<sub>3</sub>) δ 12.64 (s, 1H, SO<sub>2</sub>NHCONH), 7.50 (s, 1H, Ph-H), 7.42 (s, 1H, SO<sub>2</sub>NHCONH), 7.23 (d, *J* = 8.8 Hz, 1H, Ph-H), 6.74 (s, 1H, Ph-H), 4.05 (s, 3H, OCH<sub>3</sub>), 3.28 (t, *J* = 7.2 Hz, 4H, N(CH<sub>2</sub>CH<sub>2</sub>CH<sub>3</sub>)<sub>2</sub>), 2.57 (s, 3H, CH<sub>3</sub>), 1.70-1.55 (m, 4H, N(CH<sub>2</sub>CH<sub>2</sub>CH<sub>3</sub>)<sub>2</sub>), 0.94 (t, *J* = 7.3 Hz, 6H, N(CH<sub>2</sub>CH<sub>2</sub>CH<sub>3</sub>)<sub>2</sub>). <sup>13</sup>C NMR (101 MHz, CDCl<sub>3</sub>) δ 179.79, 170.71, 163.41, 147.91, 146.70, 135.86, 132.09, 117.08, 115.74, 115.37, 55.72, 53.05, 25.45, 20.09, 11.38. HRMS calcd for C<sub>18</sub>H<sub>25</sub>ClN<sub>6</sub>O<sub>4</sub>S<sup>+</sup>[M+H] 457.1425, found 457.1423.

5-(butyl(propyl)amino)-2-chloro-N-((4-methoxy-6-methyl-1,3,5-triazin-2-yl)carbamoyl)benzenesulfonamide **N11**: White solid, yield 90.7%, m.p. 145~147 °C; <sup>1</sup>H NMR (400 MHz, CDCl<sub>3</sub>) δ 12.62 (s, 1H, SO<sub>2</sub>NHCONH), 7.50 (d, *J* = 2.7 Hz, 1H, Ph-H), 7.39 (s, 1H, SO<sub>2</sub>NHCONH), 7.22 (d, *J* = 8.9 Hz, 1H, Ph-H), 6.72 (d, *J* = 6.8 Hz, 1H, Ph-H), 4.05 (s, 3H, OCH<sub>3</sub>), 3.37-3.17 (m, 4H, NCH<sub>2</sub>CH<sub>2</sub>CH<sub>3</sub>, NCH<sub>2</sub>CH<sub>2</sub>CH<sub>2</sub>CH<sub>3</sub>), 2.57 (s, 3H, CH<sub>3</sub>), 1.69-1.52 (m, 4H, NCH<sub>2</sub>CH<sub>2</sub>CH<sub>3</sub>, NCH<sub>2</sub>CH<sub>2</sub>CH<sub>2</sub>CH<sub>3</sub>), 1.44-1.30 (m, 2H, NCH<sub>2</sub>CH<sub>2</sub>CH<sub>2</sub>CH<sub>3</sub>), 0.90-1.00 (m, 6H, NCH<sub>2</sub>CH<sub>2</sub>CH<sub>3</sub>,

NCH<sub>2</sub>CH<sub>2</sub>CH<sub>2</sub>CH<sub>3</sub>). <sup>13</sup>C NMR (101 MHz, CDCl<sub>3</sub>) δ 179.03, 171.12, 163.41, 147.89, 146.72, 135.84, 132.07, 116.91, 115.48, 115.30, 55.71, 52.94, 51.03, 28.98, 25.46, 20.23, 20.14, 13.93, 11.39. HRMS calcd for C<sub>19</sub>H<sub>27</sub>ClN<sub>6</sub>O<sub>4</sub>S<sup>+</sup>[M+H] 471.1581, found 471.1580.

5-(benzyl(methyl)amino)-2-chloro-N-((4-methoxy-6-methyl-1,3,5-triazin-2-yl)carbamoyl)benzenesulfonamide **N12**: White solid, yield 92.8%, m.p. 79~81 °C; <sup>1</sup>H NMR (400 MHz, CDCl<sub>3</sub>) δ 12.63 (s, 1H, SO<sub>2</sub>NHCONH), 7.66 (s, 1H, SO<sub>2</sub>NHCONH), 7.63 (d, *J* = 2.6 Hz, 1H, Ph-H), 7.32 (t, *J* = 7.2 Hz, 2H, Ph-H), 7.27 (d, *J* = 6.0 Hz, 1H, Ph-H), 7.23 (s, 1H), 7.22-7.16 (m, 2H, Ph-H), 6.76 (dd, *J* = 8.8, 2.6 Hz, 1H, Ph-H), 4.57 (s, 2H, NCH<sub>2</sub>), 4.05 (s, 3H, OCH<sub>3</sub>), 3.09 (s, 3H, NCH<sub>3</sub>), 2.57 (s, 3H, CH<sub>3</sub>). <sup>13</sup>C NMR (101 MHz, CDCl<sub>3</sub>) δ 179.31, 170.62, 163.36, 148.20, 147.90, 137.20, 135.91, 132.05, 128.75, 127.29, 126.55, 117.54, 117.07, 115.38, 56.28, 55.63, 38.79, 25.37. HRMS calcd for C<sub>20</sub>H<sub>21</sub>ClN<sub>6</sub>O<sub>4</sub>S<sup>+</sup>[M+H] 477.1112, found 477.1110.

2-chloro-5-(dibutylamino)-N-((4-methoxy-6-methyl-1,3,5-triazin-2-yl)carbamoyl)benzenesulfonamide **N13**: White solid, yield 85.3%, m.p. 79~81 °C; <sup>1</sup>H NMR (400 MHz, CDCl<sub>3</sub>) δ 12.59 (s, 1H, SO<sub>2</sub>NHCONH), 7.84 (s, 1H, SO<sub>2</sub>NHCONH), 7.49 (s, 1H, Ph-H), 7.22 (d, *J* = 8.9 Hz, 1H, Ph-H), 6.70 (d, *J* = 7.9 Hz, 1H, Ph-H), 4.05 (s, 3H, NCH<sub>3</sub>), 3.30 (t, *J* = 7.6, 4H, N(CH<sub>2</sub>CH<sub>2</sub>CH<sub>2</sub>CH<sub>3</sub>)<sub>2</sub>), 2.56 (s, 3H, CH<sub>3</sub>), 1.57 (dd, *J* = 14.6, 7.4 Hz, 4H, N(CH<sub>2</sub>CH<sub>2</sub>CH<sub>2</sub>CH<sub>3</sub>)<sub>2</sub>), 1.44 -1.28 (m, 4H, N(CH<sub>2</sub>CH<sub>2</sub>CH<sub>2</sub>CH<sub>3</sub>)<sub>2</sub>), 0.96 (t, *J* = 7.3 Hz, 6H, N(CH<sub>2</sub>CH<sub>2</sub>CH<sub>2</sub>CH<sub>3</sub>)<sub>2</sub>). <sup>13</sup>C NMR (101 MHz, CDCl<sub>3</sub>) δ 179.37, 170.62, 163.48, 147.97, 146.80, 135.84, 132.03, 116.80, 115.46, 115.28, 55.69, 50.87, 29.01, 25.42, 20.22, 13.91. HRMS calcd for C<sub>20</sub>H<sub>29</sub>ClN<sub>6</sub>O<sub>4</sub>S<sup>+</sup>[M+H] 485.1738, found 485.1736.

### SI5. Degradation curves of target compounds in pH 5.52 soil

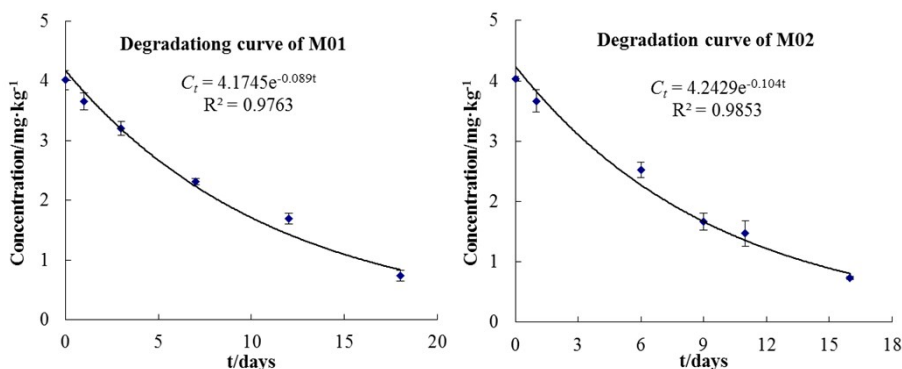



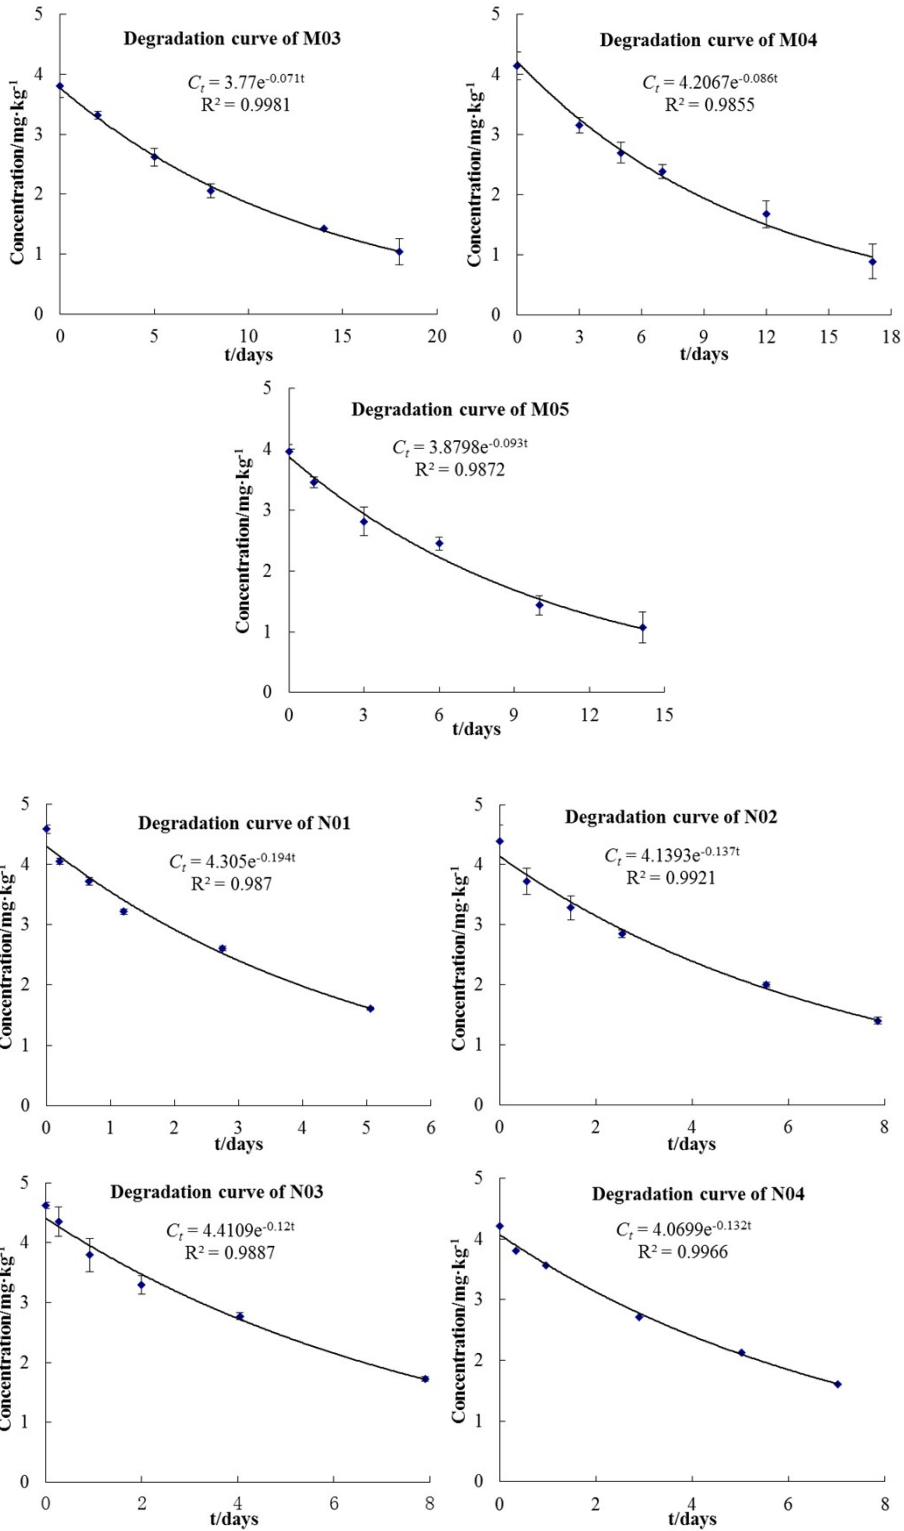

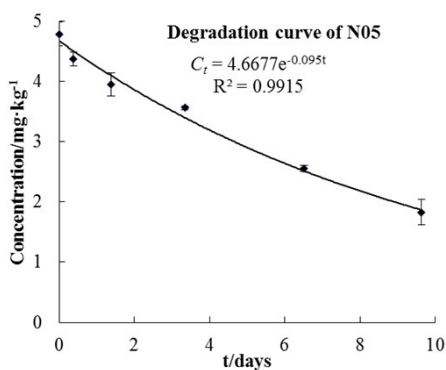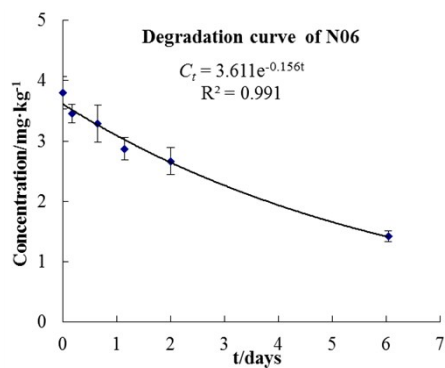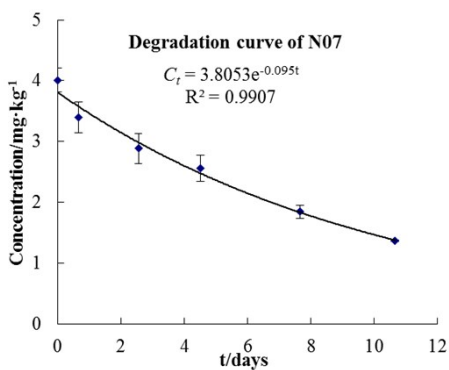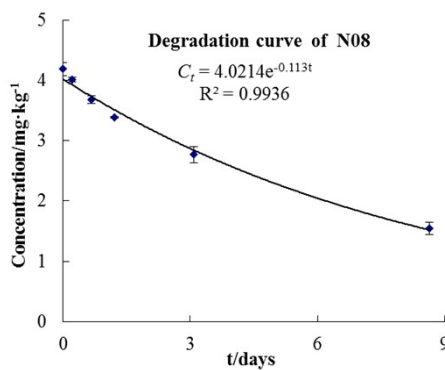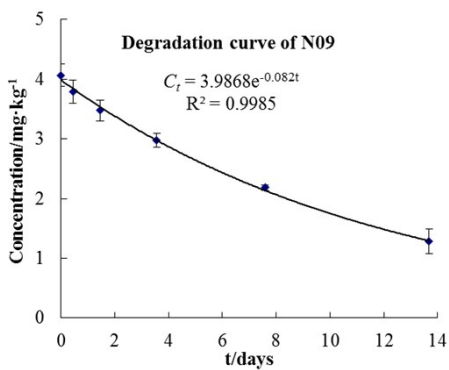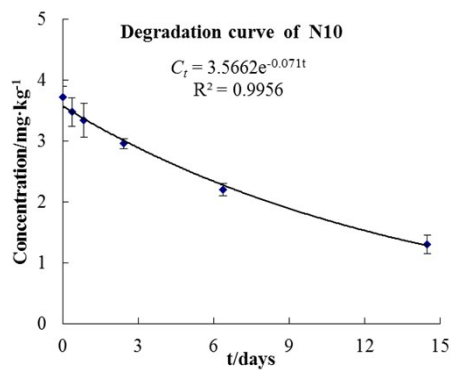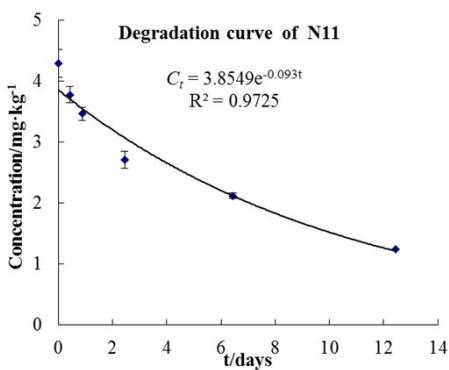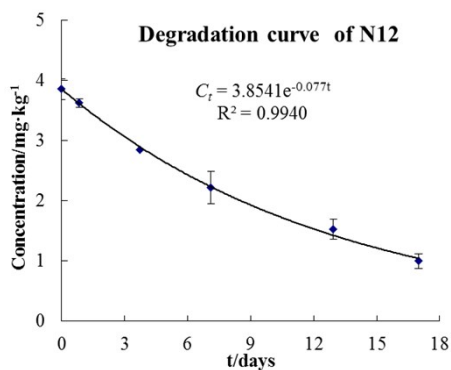

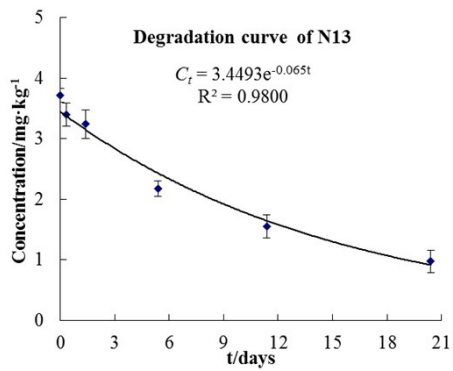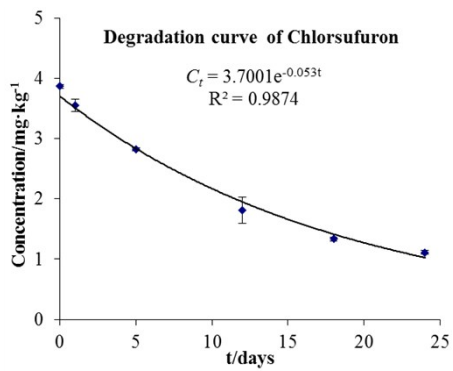

Supplement: d0ra00811g1.pdf [file d0ra00811g1.pdf]
